# Supplementary material for: The Psychometric Properties of the Center for Epidemiologic Studies Depression Scale in Chinese Primary Care Patients: Factor Structure, Construct Validity, Reliability, Sensitivity and Responsiveness
Source: PubMed Central journal article supplement (PMC4529142; doi:10.1371/journal.pone.0135131), 2015-08-07
Supplement: pone.0135131.s001.pdf [file pone.0135131.s001.pdf]

## S1 Appendix

### The bi-factor structure of the CES-D by confirmatory factor analysis

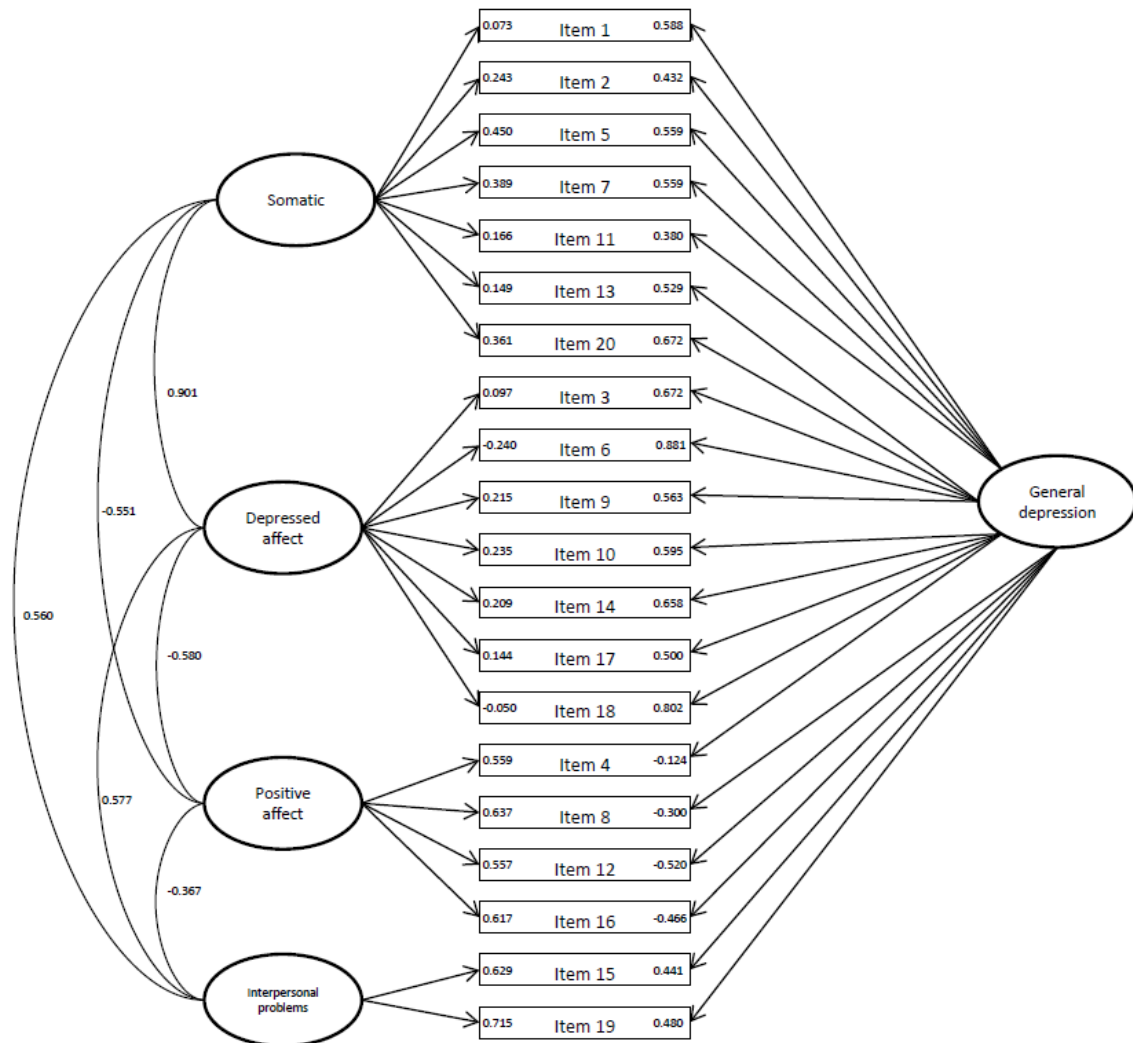

The figure shows the results of the confirmatory factor analysis by LISREL (version 8.80). In the bi-factor model, with the exception of the four “positive affect” items and two “interpersonal problem” items, all other items had a higher factor loading on the “general factors” than on the corresponding specific factors.

### Correlation coefficient matrix of the 20 items of the CES-

|         | item 1 | item 2 | item 3 | item 4 | item 5 | item 6 | item 7 | item 8 | item 9 | item 10 | item 11 | item 12 | item 13 | item 14 | item 15 | item 16 | item 17 | item 18 | item 19 | item 20 |
|---------|--------|--------|--------|--------|--------|--------|--------|--------|--------|---------|---------|---------|---------|---------|---------|---------|---------|---------|---------|---------|
| item 1  | 1      |        |        |        |        |        |        |        |        |         |         |         |         |         |         |         |         |         |         |         |
| item 2  | 0.296  | 1      |        |        |        |        |        |        |        |         |         |         |         |         |         |         |         |         |         |         |
| item 3  | 0.435  | 0.307  | 1      |        |        |        |        |        |        |         |         |         |         |         |         |         |         |         |         |         |
| item 4  | -0.081 | -0.048 | -0.097 | 1      |        |        |        |        |        |         |         |         |         |         |         |         |         |         |         |         |
| item 5  | 0.373  | 0.364  | 0.374  | -0.073 | 1      |        |        |        |        |         |         |         |         |         |         |         |         |         |         |         |
| item 6  | 0.519  | 0.388  | 0.573  | -0.086 | 0.487  | 1      |        |        |        |         |         |         |         |         |         |         |         |         |         |         |
| item 7  | 0.369  | 0.332  | 0.396  | -0.071 | 0.484  | 0.493  | 1      |        |        |         |         |         |         |         |         |         |         |         |         |         |
| item 8  | -0.163 | -0.111 | -0.230 | 0.477  | -0.182 | -0.236 | -0.202 | 1      |        |         |         |         |         |         |         |         |         |         |         |         |
| item 9  | 0.326  | 0.203  | 0.404  | -0.099 | 0.311  | 0.448  | 0.362  | -0.241 | 1      |         |         |         |         |         |         |         |         |         |         |         |
| item 10 | 0.369  | 0.239  | 0.423  | -0.095 | 0.384  | 0.470  | 0.353  | -0.182 | 0.394  | 1       |         |         |         |         |         |         |         |         |         |         |
| item 11 | 0.259  | 0.274  | 0.237  | 0.054  | 0.283  | 0.338  | 0.292  | -0.061 | 0.196  | 0.237   | 1       |         |         |         |         |         |         |         |         |         |
| item 12 | -0.322 | -0.227 | -0.370 | 0.342  | -0.305 | -0.436 | -0.290 | 0.481  | -0.291 | -0.285  | -0.202  | 1       |         |         |         |         |         |         |         |         |
| item 13 | 0.314  | 0.260  | 0.351  | -0.150 | 0.371  | 0.441  | 0.318  | -0.197 | 0.298  | 0.325   | 0.189   | -0.286  | 1       |         |         |         |         |         |         |         |
| item 14 | 0.341  | 0.270  | 0.454  | -0.094 | 0.373  | 0.531  | 0.348  | -0.236 | 0.417  | 0.436   | 0.249   | -0.342  | 0.425   | 1       |         |         |         |         |         |         |
| item 15 | 0.272  | 0.208  | 0.312  | -0.118 | 0.296  | 0.331  | 0.264  | -0.173 | 0.295  | 0.328   | 0.125   | -0.217  | 0.311   | 0.354   | 1       |         |         |         |         |         |
| item 16 | -0.275 | -0.199 | -0.341 | 0.361  | -0.293 | -0.374 | -0.272 | 0.510  | -0.288 | -0.289  | -0.140  | 0.632   | -0.283  | -0.340  | -0.235  | 1       |         |         |         |         |
| item 17 | 0.317  | 0.250  | 0.360  | -0.081 | 0.266  | 0.401  | 0.284  | -0.162 | 0.310  | 0.365   | 0.208   | -0.231  | 0.301   | 0.350   | 0.239   | -0.201  | 1       |         |         |         |
| item 18 | 0.460  | 0.334  | 0.511  | -0.093 | 0.430  | 0.720  | 0.422  | -0.235 | 0.440  | 0.453   | 0.318   | -0.451  | 0.412   | 0.519   | 0.342   | -0.373  | 0.416   | 1       |         |         |
| item 19 | 0.299  | 0.224  | 0.352  | -0.135 | 0.300  | 0.350  | 0.287  | -0.185 | 0.329  | 0.338   | 0.137   | -0.249  | 0.316   | 0.387   | 0.661   | -0.265  | 0.260   | 0.387   | 1       |         |
| item 20 | 0.388  | 0.353  | 0.436  | -0.106 | 0.536  | 0.581  | 0.529  | -0.239 | 0.388  | 0.400   | 0.303   | -0.395  | 0.429   | 0.472   | 0.329   | -0.369  | 0.286   | 0.556   | 0.372   | 1       |
