# Supplementary material for: The Psychometric Properties of the Center for Epidemiologic Studies Depression Scale in Chinese Primary Care Patients: Factor Structure, Construct Validity, Reliability, Sensitivity and Responsiveness
Source: PubMed Central journal article supplement (PMC4529142; doi:10.1371/journal.pone.0135131), 2015-08-07
Supplement: pone.0135131.s002.pdf [file pone.0135131.s002.pdf]

**S1 Figure. Subject Recruitment Flowchart**

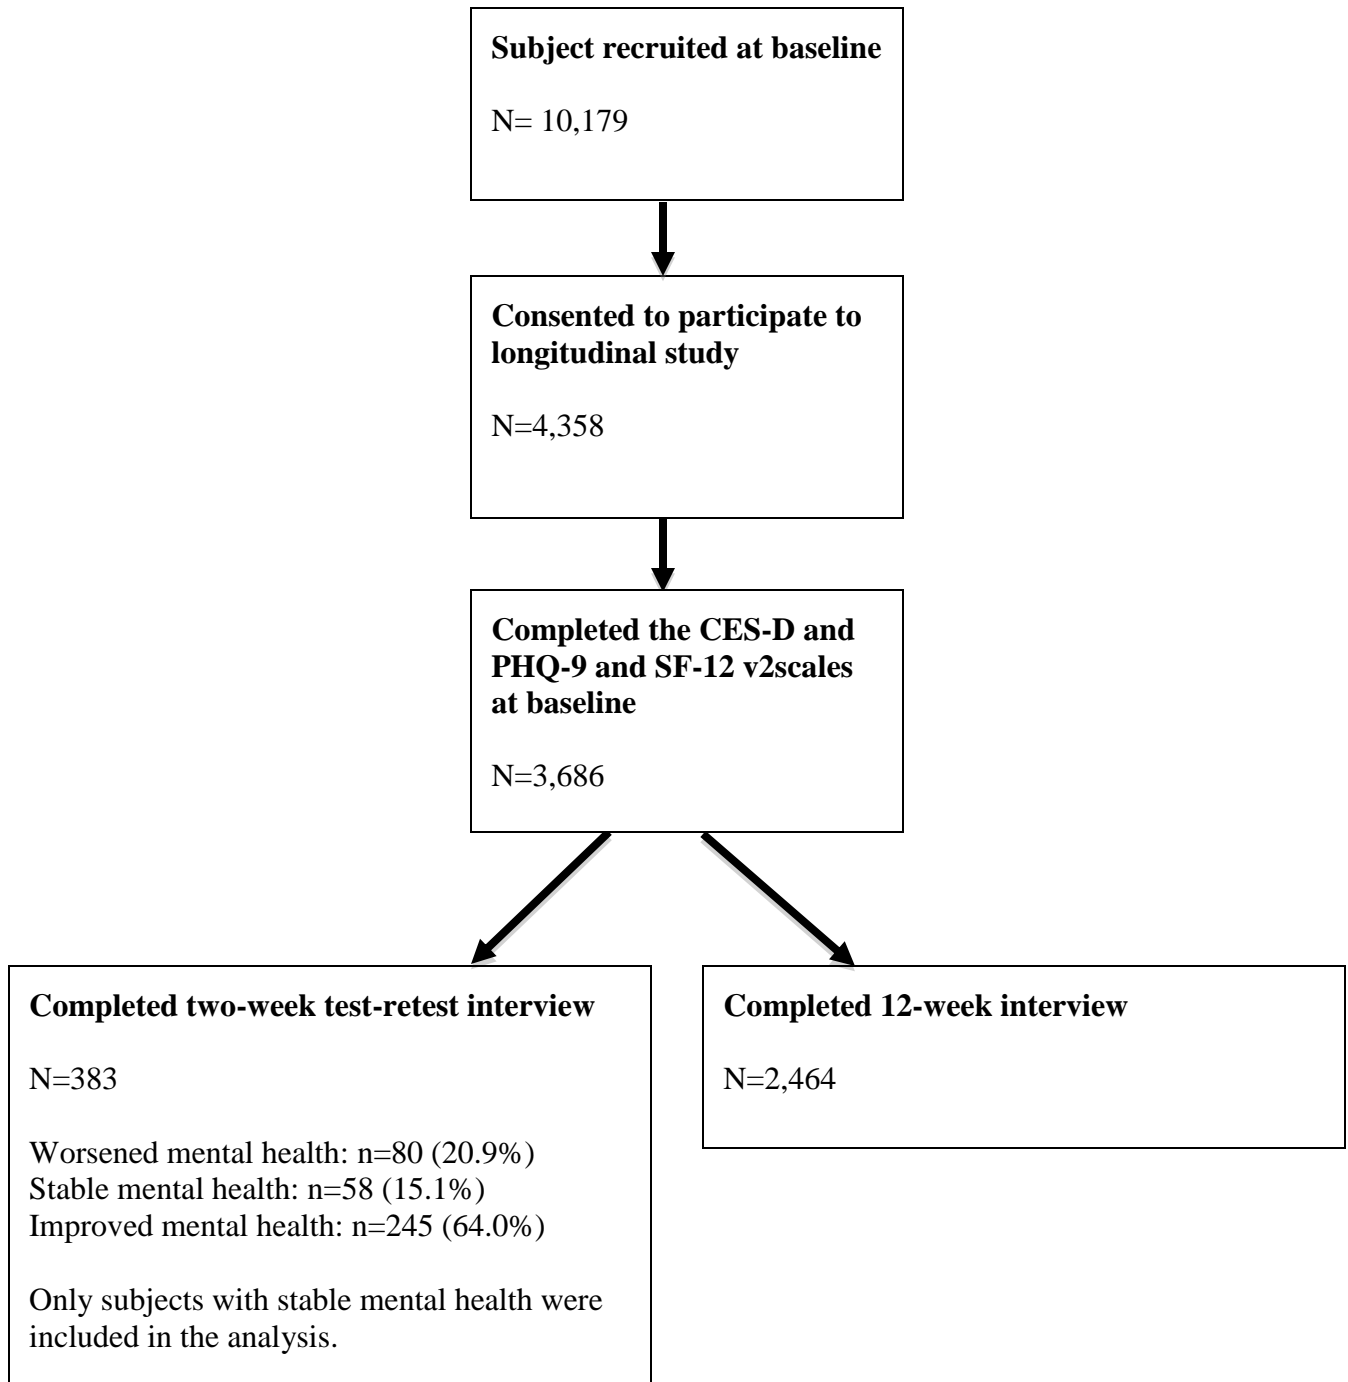

CES-D: Center for Epidemiologic Studies Depression Scale  
PHQ-9: Patient Health Questionnaire -9
