# Supplementary material for: The Psychometric Properties of the Center for Epidemiologic Studies Depression Scale in Chinese Primary Care Patients: Factor Structure, Construct Validity, Reliability, Sensitivity and Responsiveness
Source: PubMed Central journal article supplement (PMC4529142; doi:10.1371/journal.pone.0135131), 2015-08-07
Supplement: pone.0135131.s003.pdf [file pone.0135131.s003.pdf]

## S2 Fig

**The sensitivity of the CES-D and the PHQ-9 to differentiate subjects with depression and those without depression**

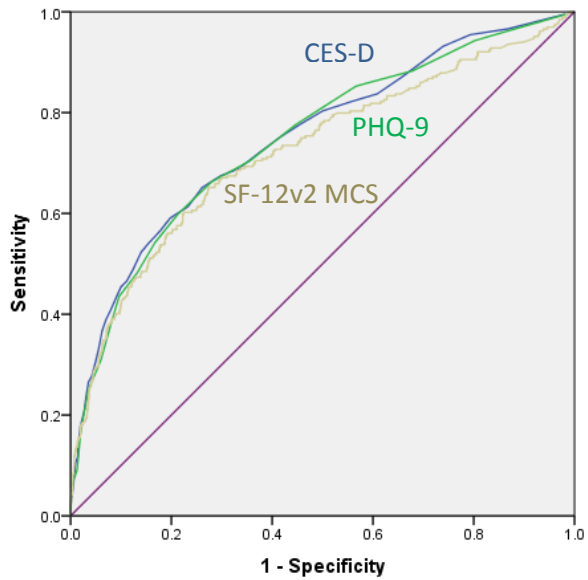

The figure shows the ROC curve for sensitivity analysis. The CES-D, PHQ-9 and SF-12 v2 MCS were sensitive enough to detect difference between the subject, with an AUC >0.7 for all instruments.
