# Supplementary material for: The Psychometric Properties of the Center for Epidemiologic Studies Depression Scale in Chinese Primary Care Patients: Factor Structure, Construct Validity, Reliability, Sensitivity and Responsiveness
Source: PubMed Central journal article supplement (PMC4529142; doi:10.1371/journal.pone.0135131), 2015-08-07
Supplement: pone.0135131.s004.pdf [file pone.0135131.s004.pdf]

### S3 Fig

#### The external responsiveness of the CES-D and the SF-12 v2 MCS

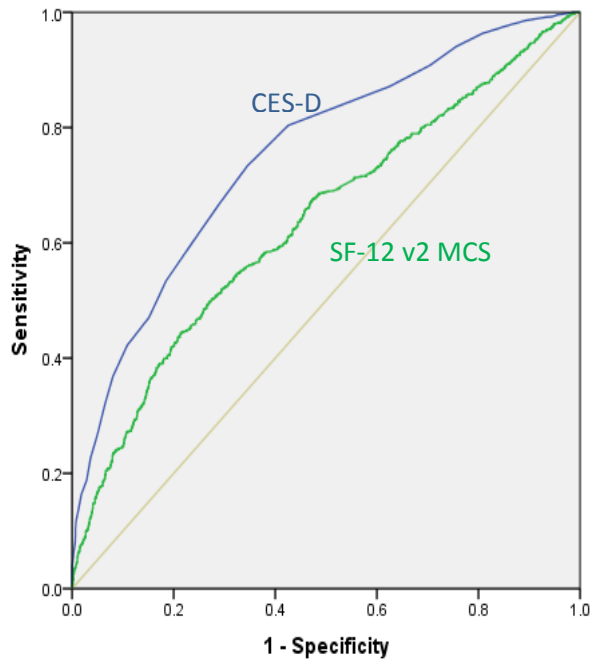

The figure shows the ROC curve for sensitivity analysis. With the standard of the  $AUC > 0.7$ , the CES-D ( $AUC = 0.75$ ) but not the PHQ-9 ( $AUC = 0.64$ ) was adequate to differentiate subjects who improved and those with stable or worsened depressive symptoms
