# Supplementary material for: The Psychometric Properties of the Center for Epidemiologic Studies Depression Scale in Chinese Primary Care Patients: Factor Structure, Construct Validity, Reliability, Sensitivity and Responsiveness
Source: PubMed Central journal article supplement (PMC4529142; doi:10.1371/journal.pone.0135131), 2015-08-07
Supplement: pone.0135131.s005.pdf [file pone.0135131.s005.pdf]

## S1 Instrument

流行病學研究中心抑鬱量表The Center for Epidemiologic Studies Depression Scale (CES-D)

以下句子描述一些自我感覺或行為。請圈出最接近您過去一週的狀況。

Below is a list of some of the ways you may have felt or behaved. Please indicate how often you have felt this way during the **past week**: (*circle one number on each line*)

| <u>過去一週</u><br>During the past week...                                                                     | 很少或<br>完全沒有<br>Rarely or<br>none of the<br>time<br><br>(少過 1<br>日)<br>(Less than 1<br>day) | 有幾天<br>Some or a<br>little of the<br>time<br><br>(持續 1-2<br>日)<br>(1-2 days) | 間中或<br>一半時間<br>Occasional or<br>moderate<br>amount of<br>time<br><br>(持續 3-4<br>日)<br>(3-4 days) | 經常或<br>近乎每天<br>Most or all<br>of the time<br><br>(持續 5-7<br>日)<br>(5-7 days) |
|------------------------------------------------------------------------------------------------------------|--------------------------------------------------------------------------------------------|------------------------------------------------------------------------------|--------------------------------------------------------------------------------------------------|------------------------------------------------------------------------------|
| 1. 我被一些平時不會困擾我的事情困擾<br>I was bothered by things that usually don't<br>bother me                            | 0                                                                                          | 1                                                                            | 2                                                                                                | 3                                                                            |
| 2. 我不想吃東西，我的胃口很差<br>I did not feel like eating; my appetite was poor                                       | 0                                                                                          | 1                                                                            | 2                                                                                                | 3                                                                            |
| 3. 即使有家人和朋友的幫忙，我仍然<br>覺得憂鬱<br>I felt that I could not shake off the blues even<br>with help from my family | 0                                                                                          | 1                                                                            | 2                                                                                                | 3                                                                            |
| 4. 我覺得我不比其他人差<br>I felt that I was just as good as other people                                            | 0                                                                                          | 1                                                                            | 2                                                                                                | 3                                                                            |
| 5. 我很難集中精神工作<br>I had trouble keeping my mind on what I was<br>doing                                       | 0                                                                                          | 1                                                                            | 2                                                                                                | 3                                                                            |
| 6. 我覺得情緒低落<br>I felt depressed                                                                             | 0                                                                                          | 1                                                                            | 2                                                                                                | 3                                                                            |
| 7. 我覺得我做每件事情都很吃力<br>I felt that everything I did was an effort                                             | 0                                                                                          | 1                                                                            | 2                                                                                                | 3                                                                            |
| 8. 我對將來抱有希望<br>I felt hopeful about the future                                                             | 0                                                                                          | 1                                                                            | 2                                                                                                | 3                                                                            |
| 9. 我覺得自己一生很失敗<br>I thought my life had been a failure                                                      | 0                                                                                          | 1                                                                            | 2                                                                                                | 3                                                                            |

|                                                  |   |   |   |   |
|--------------------------------------------------|---|---|---|---|
| 10. 我覺得恐懼<br>I felt fearful                      | 0 | 1 | 2 | 3 |
| 11. 我睡眠不安寧<br>My sleep was restless              | 0 | 1 | 2 | 3 |
| 12. 我很開心<br>I was happy                          | 0 | 1 | 2 | 3 |
|                                                  |   |   |   |   |
| 13. 我比平時少說話<br>I talked less than usual          | 0 | 1 | 2 | 3 |
| 14. 我覺得孤獨<br>I felt lonely                       | 0 | 1 | 2 | 3 |
| 15. 我覺得其他人不友善<br>People were unfriendly          | 0 | 1 | 2 | 3 |
| 16. 我很享受生活<br>I enjoyed life                     | 0 | 1 | 2 | 3 |
|                                                  |   |   |   |   |
| 17. 我會經常無故哭泣<br>I had crying spells              | 0 | 1 | 2 | 3 |
| 18. 我覺得不開心<br>I felt sad                         | 0 | 1 | 2 | 3 |
| 19. 我覺得其他人不喜歡我<br>I felt that people disliked me | 0 | 1 | 2 | 3 |
| 20. 我提不起勁<br>I could not get "going"             | 0 | 1 | 2 | 3 |
